# Supplementary material for: Emergent Myxobacterial Behaviors Arise from Reversal Suppression Induced by Kin Contacts
Source: PubMed Central journal article supplement (PMC8651087; doi:10.1128/msystems.00720-21), 2021-12-07

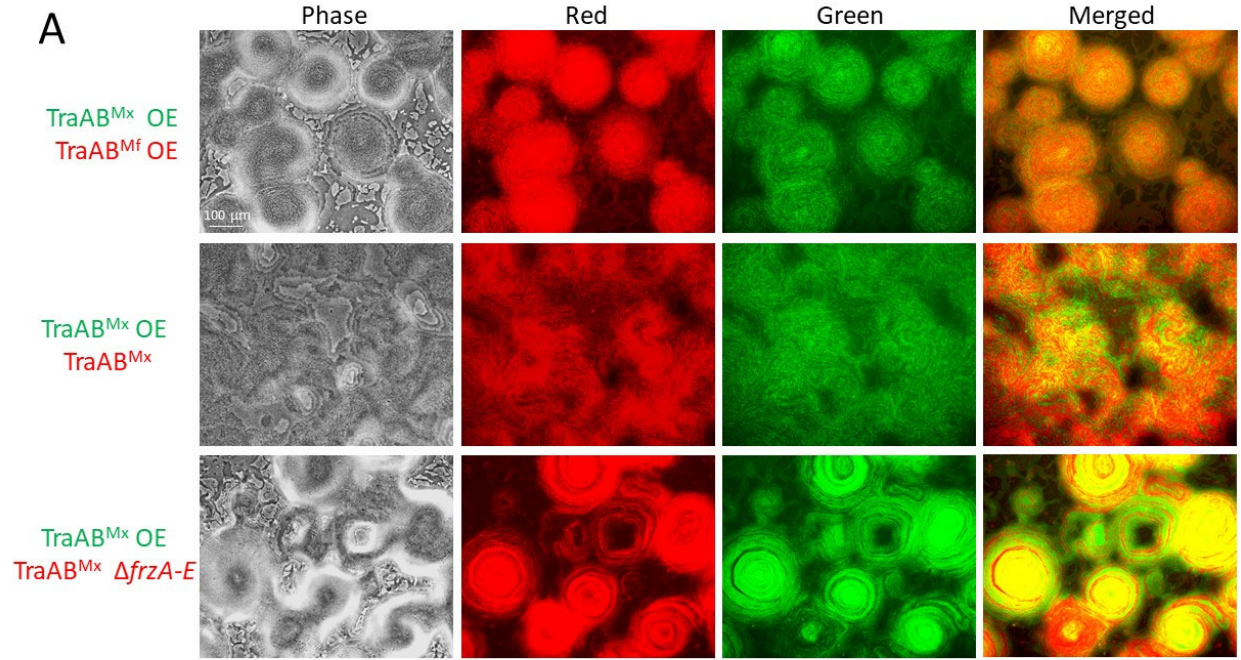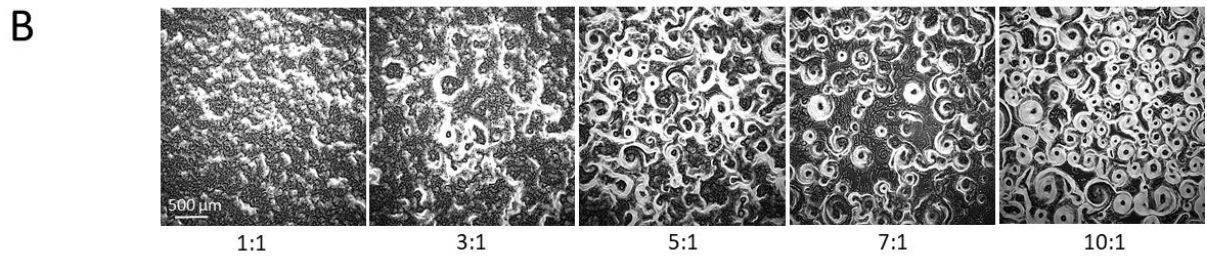

Supplement: msystems.00720-21-sf007.pdf [file msystems.00720-21-sf007.pdf]
